# Supplementary material
Source: PubMed Central journal article supplement (PMC2848822)
Supplement: jc.2009-0994_1.pdf [file jc.2009-0994_1.pdf]

Fig.S1

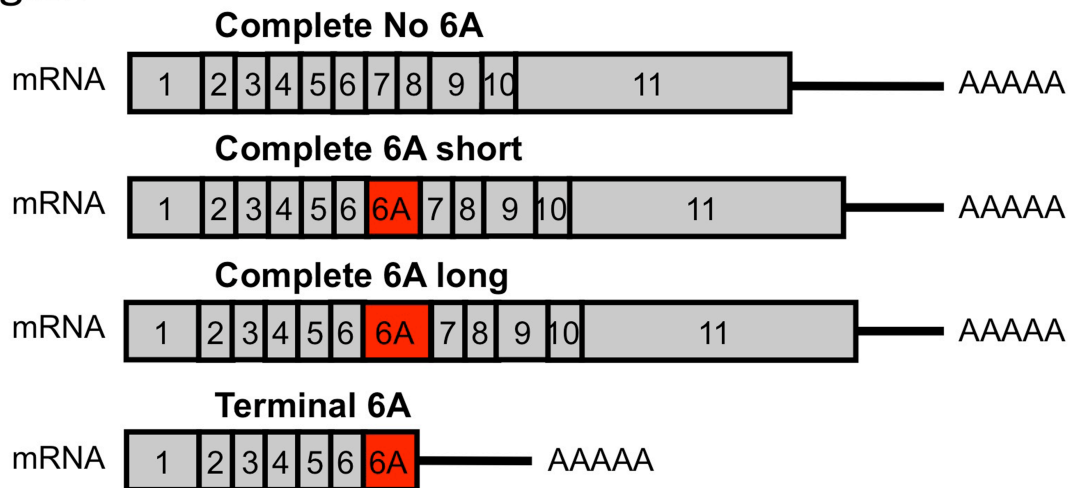

**FIG. S1:** Major *LHCGR* splice isoforms generated in the human testis (Kossack N, Simoni M, Richter-Unruh A, Themmen AP, Gromoll J 2008 Mutations in a novel, cryptic exon of the luteinizing hormone/chorionic gonadotropin receptor gene cause male pseudohermaphroditism. PLoS Med 5(4):e88). Primers amplifying exons 9-11 (1O'Shaughnessy PJ, Baker PJ, Monteiro A, Cassie S, Bhattacharya S, Fowler PA 2007 Developmental changes in human fetal testicular cell numbers and messenger ribonucleic acid levels during the second trimester. J Clin Endocrinol Metab 92(12):4792-801) will clearly identify the forms "Complete No 6A" and both long and short forms of "Complete 6A".
